# Supplementary material
Source: ML conference proceedings conference paper supplement (https://openaccess.thecvf.com/content/ICCV2023/html/Jungerman_Panoramas_from_Photons_ICCV_2023_paper.html)
Supplement: Supplementary file 1 [file Jungerman_Panoramas_from_Photons_ICCV_2023_supplemental.zip]

Archive with 3 entries (3 files):
- 05320-supp.pdf
- overview.mp4
- overview.srt
